# Supplementary material for: Bioprospection of Natural Sources of Polyphenols with Therapeutic Potential for Redox-Related Diseases
Source: MDPI journal article supplement (doi:10.3390/antiox9090789), 2020-08-26
Supplement: s1 [file s1]

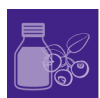

# Bioprospection of natural sources of polyphenols with therapeutic potential for redox-related diseases

**Regina Menezes** <sup>1,2,3,†</sup>, **Alexandre Foito** <sup>4,†</sup>, **Carolina Jardim** <sup>2,3</sup>, **Inês Costa** <sup>2,3</sup>, **Gonçalo Garcia** <sup>2,3</sup>, **Rita Rosado-Ramos** <sup>1,2,3</sup>, **Sabine Freitag** <sup>4</sup>, **Colin James Alexander** <sup>5</sup>, **Tiago Fleming Outeiro** <sup>6,7,8</sup>, **Derek Stewart** <sup>4,9</sup> and **Cláudia N. Santos** <sup>1,2,3,\*</sup>

- <sup>1</sup> CEDOC, Chronic Diseases Research Centre, NOVA Medical School / Faculdade de Ciências Médicas, Universidade NOVA de Lisboa, Campo dos Mártires da Pátria, 130, 1169-056 Lisboa, Portugal; regina.menezes@nms.unl.pt (R.M.); rita.ramos@nms.unl.pt (R.R.-R.); (C.N.S.)
  - <sup>2</sup> iBET, Instituto de Biologia Experimental e Tecnológica, Apartado 12, 2781-901 Oeiras, Portugal; cjardim@medicina.ulisboa.pt (C.J.); inescosta.bms@gmail.com (I.C.); ggarcia@campus.ul.pt (G.G.)
  - <sup>3</sup> Instituto de Tecnologia Química e Biológica, Universidade Nova de Lisboa, Av. da República, 2780-157 Oeiras, Portugal
  - <sup>4</sup> Environmental and Biochemical Science Group, The James Hutton Institute, DD2 5DA Dundee, UK; alex.foito@hutton.ac.uk (A.F.); Sabine.Freitag@hutton.ac.uk (S.F.); Derek.Stewart@hutton.ac.uk (D.S.)
  - <sup>5</sup> Biomathematics and Statistics Scotland, Invergowrie, DD2 5DA Dundee, UK; Colin.Alexander@hutton.ac.uk
  - <sup>6</sup> Department of Experimental Neurodegeneration, Center for Nanoscale Microscopy and Molecular Physiology of the Brain, Center for Biostructural Imaging of Neurodegeneration, University Medical Center Göttingen, 37073 Göttingen, Germany; touteir@gwdg.de
  - <sup>7</sup> Max Planck Institute for Experimental Medicine, 37075 Göttingen, Germany
  - <sup>8</sup> Translational and Clinical Research Institute, Faculty of Medical Sciences, Newcastle University, Framlington Place, Newcastle Upon Tyne, NE2 4HH, UK
  - <sup>9</sup> School of Engineering and Physical Sciences, Institute of Mechanical, Process and Energy Engineering, Heriot-Watt University, EH14 4AS Edinburgh, UK; D.Stewart@hw.ac.uk
- <sup>†</sup> These authors contributed equally to this work.  
<sup>\*</sup> Correspondence: claudia.nunes.santos@nms.unl.pt

Received: 22 July 2020; Accepted: 18 August 2020; Published: date

## INDEX

|                                                                                  |           |
|----------------------------------------------------------------------------------|-----------|
| <b>1. Supplementary tables.....</b>                                              | <b>3</b>  |
| Table S1. <i>Rubus</i> species/varieties used in this study.....                 | 3         |
| Table S2. Significant compounds from Runs test for all disease models tested.... | 5         |
| Table S3. Yeast strains used in this study.....                                  | 7         |
| Table S4. Plasmids used in this study.....                                       | 8         |
| <b>2. Supplementary methods .....</b>                                            | <b>9</b>  |
| 2.1 Yeast plasmids and strains.....                                              | 9         |
| 2.2 Yeast growth conditions.....                                                 | 9         |
| 2.3 Growth assays.....                                                           | 9         |
| 2.4 Growth curve data analysis methods.....                                      | 9         |
| 2.5 Flow cytometry.....                                                          | 9         |
| 2.6 Fluorescence microscopy.....                                                 | 10        |
| 2.7 Protein extraction and immunoblotting.....                                   | 10        |
| 2.8 $\beta$ -Galactosidase assays.....                                           | 10        |
| 2.9 Statistical analysis.....                                                    | 10        |
| <b>3. Supplementary figures – Part I .....</b>                                   | <b>11</b> |
| Figure S1. PCA analysis of entire positive mode dataset.....                     | 11        |
| Figure S2. PCA analysis of entire negative mode dataset.....                     | 12        |
| <b>4. Supplementary information: SMART discovery platform.....</b>               | <b>13</b> |
| Figure S3. Yeast model of Parkinson’s disease.....                               | 14        |
| Figure S4. Yeast model of Amyotrophic Lateral Sclerosis.....                     | 15        |
| Figure S5. Yeast model of Huntington’s disease. ....                             | 16        |
| Figure S6. Yeast model of Alzheimer’s disease.....                               | 17        |
| Figure S7. Yeast model of RAS/RAF interaction.....                               | 18        |
| Figure S8. Yeast model of Crz1 activation.....                                   | 19        |
| Figure S9. Supplementary data for the cancer (HRAS/KRAS) model.....              | 20        |
| Figure S10. Supplementary data for the Crz1-activation model.....                | 21        |
| <b>5. Supplementary figures – Part II .....</b>                                  | <b>22</b> |
| Figure S11. Visual representation of the Runs test.....                          | 22        |
| <b>6. References .....</b>                                                       | <b>23</b> |

## 1. Supplementary tables

Table S1 I *Rubus* species/varieties used in this study.

| Species                                                                                                                   | Variety         | Source Location |
|---------------------------------------------------------------------------------------------------------------------------|-----------------|-----------------|
| <i>Rubus armeniacus</i> Focke [= <i>R. procerus</i> auct.])                                                               | Himalayan Giant | UK              |
| <i>Rubus bartonii</i> Newton syn. 'Ashton Cross'                                                                          | Ashton Cross    | UK              |
| <i>Rubus fruticosus</i> L. agg.                                                                                           | B13*            | UK              |
| <i>Rubus fruticosus</i> L. agg.                                                                                           | B14*            | UK              |
| <i>Rubus ursinus</i> x <i>R. armeniacus</i> x <i>R. idaeus</i>                                                            | Black Butte     | UK              |
| <i>Rubus fruticosus</i> L. agg.                                                                                           | Fantasia        | UK              |
| <i>Rubus fruticosus</i> L. agg.                                                                                           | Karaka Black    | UK              |
| <i>R. ursinus</i> x <i>R.ursinus</i> x <i>R.idaeus</i> x <i>R. ursinus</i> x <i>R. allegheniensis</i> x <i>R. argutus</i> | Kotata          | UK              |
| <i>Rubus ursinus</i> x <i>R.ursinus</i> x <i>R.idaeus</i>                                                                 | Ollalie         | UK              |
| <i>Rubus idaeus</i> L.                                                                                                    | Glen Ample      | UK              |
| <i>Rubus idaeus</i> L.                                                                                                    | Glen Fyne       | UK              |
| <i>Rubus idaeus</i> L.                                                                                                    | Malling Admiral | UK              |
| <i>Rubus idaeus</i> L.                                                                                                    | Malmer Szedler  | UK              |
| <i>Rubus idaeus</i> L.                                                                                                    | Octavia         | UK              |
| <i>Rubus idaeus</i> L.                                                                                                    | Polana          | UK              |
| <i>Rubus idaeus</i> L.                                                                                                    | Prestige        | UK              |
| <i>Rubus idaeus</i> L.                                                                                                    | Tulameen        | UK              |
| <i>Rubus loganobaccus</i> L.H.Bailey                                                                                      | Nectarberry     | UK              |
| <i>Rubus loganobaccus</i> L.H.Bailey                                                                                      | Boysenberry     | UK              |
| <i>Rubus loganobaccus</i> L.H.Bailey                                                                                      | Loganberry      | UK              |
| <i>Rubus loganobaccus</i> L.H.Bailey                                                                                      | LY59-10*        | UK              |
| <i>Rubus loganobaccus</i> L.H.Bailey                                                                                      | Riwaka Choice   | UK              |
| <i>Rubus loganobaccus</i> L.H.Bailey                                                                                      | Sunberry        | UK              |
| <i>Rubus loganobaccus</i> L.H.Bailey                                                                                      | Tayberry        | UK              |

|                                         |             |    |
|-----------------------------------------|-------------|----|
| <i>Rubus occidentalis</i> L.            | Black Hawk  | UK |
| <i>Rubus occidentalis</i> L.            | Huron       | UK |
| <i>Rubus occidentalis</i> L.            | Plum Farmer | UK |
| <i>Rubus phoenicolasius</i> Maxim.      | Wineberry   | UK |
| <i>Rubus brigantinus</i> Samp.          | -           | PT |
| <i>Rubus genevieri</i> Boreau.          | -           | PT |
| <i>Rubus henriquesii</i> Samp.          | -           | PT |
| <i>Rubus hochstetterorum</i> Seub.      | -           | PT |
| <i>Rubus sampaioanus</i> Sudre ex Samp. | -           | PT |
| <i>Rubus vagabundus</i> Samp.           | -           | PT |



**Table S2 I** Significant compounds from Runs test for all disease models tested.

| Retention time (min) | Mode     | m/z      | Adduct/fragment                                    | Molecular Formula (<5ppm)                                    | Putative ID                    | ID confidence level <sup>1</sup> | Runs test significance level <sup>2</sup> | Disease model         |
|----------------------|----------|----------|----------------------------------------------------|--------------------------------------------------------------|--------------------------------|----------------------------------|-------------------------------------------|-----------------------|
| 19.93                | Positive | 479.0822 | [M+H] <sup>+</sup>                                 | C <sub>21</sub> H <sub>18</sub> O <sub>13</sub>              | Quercetin 3-O-glucuronide      | 1                                | **                                        | HTT toxicity          |
| 23.58                | Negative | 625.0597 | -                                                  | N/A                                                          | Unknown                        | 4                                | *                                         |                       |
| 24.50                | Positive | 503.3365 | [M+H] <sup>+</sup>                                 | C <sub>30</sub> H <sub>46</sub> O <sub>6</sub>               | Hydroxy-oxopomolic acid isomer | 3                                | **                                        |                       |
| 2.48                 | Positive | 132.1020 | [M+H] <sup>+</sup>                                 | C <sub>6</sub> H <sub>13</sub> NO <sub>2</sub>               | leucine or leucine-isomer      | 2                                | *                                         | FUS toxicity          |
| 13.38                | Negative | 323.0977 | [M-Benzoic acid-H] <sup>-</sup> in-source fragment | C <sub>19</sub> H <sub>26</sub> O <sub>12</sub>              | Benzoyl-dihexoside             | 3                                | *                                         | KRAS/BRAF interaction |
| 13.40                | Positive | 464.1815 | [M+NH <sub>4</sub> ] <sup>+</sup>                  |                                                              |                                | 3                                | *                                         |                       |
| 13.40                | Positive | 267.0897 | [M-gluc+H] <sup>+</sup> in-source fragment         |                                                              |                                | 3                                | *                                         |                       |
| 13.41                | Positive | 105.0378 | [M-2glucose+H] <sup>+</sup> in-source fragment     |                                                              |                                | 3                                | *                                         |                       |
| 14.55                | Positive | 291.0864 | [M+H] <sup>+</sup>                                 | C <sub>15</sub> H <sub>14</sub> O <sub>6</sub>               | (-)-Epicatechin                | 1                                | *                                         |                       |
| 14.55                | Negative | 289.0718 | [M-H] <sup>-</sup>                                 |                                                              |                                | 1                                | *                                         |                       |
| 14.63                | Positive | 381.1148 | -                                                  | N/A                                                          | Unknown                        | 4                                | *                                         |                       |
| 15.26                | Positive | 613.1682 | C <sub>13</sub> Isomer of 611.1632                 | C <sub>27</sub> H <sub>31</sub> O <sub>16</sub> <sup>+</sup> | Cyanidin 3-O-Sophoroside       | 1                                | **                                        |                       |
| 15.33                | Negative | 743.2037 | [M-H] <sup>-</sup>                                 | C <sub>32</sub> H <sub>40</sub> O <sub>20</sub>              | Unknown                        | 4                                | *                                         |                       |
| 17.04                | Positive | 579.1709 | M <sup>+</sup>                                     | C <sub>27</sub> H <sub>31</sub> O <sub>14</sub> <sup>+</sup> | Pelargonidin 3-O-rutinoside    | 1                                | *                                         |                       |

|       |          |          |                                   |                                                              |                           |   |    |                 |
|-------|----------|----------|-----------------------------------|--------------------------------------------------------------|---------------------------|---|----|-----------------|
| 17.26 | Positive | 609.1812 | M <sup>+</sup>                    | C <sub>28</sub> H <sub>33</sub> O <sub>15</sub> <sup>+</sup> | Peonidin 3-O-rutinoside   | 1 | *  |                 |
| 23.52 | Positive | 471.3476 | [M+H] <sup>+</sup>                | C <sub>30</sub> H <sub>46</sub> O <sub>4</sub>               | Unidentified Triterpenoid | 3 | *  |                 |
| 36.35 | Positive | 316.2849 | [M+H] <sup>+</sup>                | C <sub>18</sub> H <sub>37</sub> NO <sub>3</sub>              | Hydroxysphingosine        | 2 | *  |                 |
| 14.65 | Positive | 897.2101 | [2M <sup>+</sup> -H] <sup>+</sup> | C <sub>21</sub> H <sub>21</sub> O <sub>11</sub> <sup>+</sup> | Cyanidin-hexoside         | 3 | *  | Crz1 activation |
| 20.56 | Positive | 667.2984 | [M+H] <sup>+</sup>                | C <sub>33</sub> H <sub>46</sub> O <sub>14</sub>              | Unknown                   | 4 | ** |                 |

<sup>1</sup> The Metabolomics Standards Initiative [1] defined four levels of metabolite identification confidence to which the manuscript has adhered to. Confidently identified compounds are classified as a level 1 and require evidence based on two or more orthogonal properties with an authentic chemical standard analyzed under identical analytical conditions. Putatively annotated compounds are classified as level 2 and are based upon physicochemical properties and/or spectral similarity with public commercial spectral libraries, without reference to authentic chemical standards. Putatively annotated compound classes are categorized as level 3, and are based upon characteristic physicochemical properties of a chemical class of compounds, or by spectral similarity to known compounds of a chemical class. Unknown compounds are classified as level 4 and although they remain unidentified and unclassified, these metabolites can still be differentiated and quantified based upon spectral data.;

<sup>2</sup> Statistical significance level \**p-value* <0.05, \*\**p-value* <0.01

**Table S3 I** Yeast strains used in this study.

| Strain      | Genotype                                                                                  | Source or Reference |
|-------------|-------------------------------------------------------------------------------------------|---------------------|
| W303-1A_Syn | <i>MATa can1-100 his3-11,15 leu2-3,112 ade2-1 GAL1pr-syn WT::TRP1 GAL1pr-syn WT::URA3</i> | [2]                 |
| W303-1A_TU* | <i>MATa can1-100 his3-11,15 leu2-3,112 ade2-1 TRP1 URA3</i>                               | [2]                 |
| W303-1A_FUS | <i>MATa can1-100 ura3-1 his3-11,15 leu2-3,112 ade2-1 GAL1pr-FUS::TRP1</i>                 | This study          |
| W303-1A_T*  | <i>MATa can1-100 ura3-1 his3-11,15 leu2-3,112 ade2-1 TRP1</i>                             | This study          |
| BY4741_erg6 | <i>MATa his3Δ1 leu2Δ0 lys2Δ0 ura3Δ0 YBR082c::kanMX4</i>                                   | EUROSCARF **        |
| SKY197      | <i>MATα ura3 his3 trp1 1LexAop-LEU2 λclop-LYS2 pdr1::GAL1pr-HXT9 pdr3::GAL1pr-HXT11</i>   | [3]                 |
| YAA5        | <i>MATα his3 leu2 lys2 ura3 aur1::AUR1-C-4xCDRE-lacZ</i>                                  | [4]                 |
| YAA6_crz1*  | <i>MATα his3 leu2 lys2 ura3 YNL027W::HIS3MX4 aur1::AUR1-C-4xCDRE-lacZ</i>                 | [4]                 |
| YAA7_cnb1*  | <i>MATα his3 leu2 lys2 ura3 YKL190W:: kanMX4 aur1::AUR1-C-4xCDRE-lacZ</i>                 | [4]                 |
| YAA3        | <i>MATα his3::CRZ1-GFP-HIS3 leu2 ura3 met15</i>                                           | [4]                 |

\*Control strains, \*\*EUROPEAN SACCHAROMYCES CEREVISIAE ARCHIVE FOR FUNCTIONAL ANALYSIS (<http://web.uni-frankfurt.de/fb15/mikro/euroscarf/>)

**Table S4 I** Plasmids used in this study.

| Plasmid                      | Plasmid features | Source or Reference |
|------------------------------|------------------|---------------------|
| pAG304_GAL1pr-FUS            | Integrative      | [5]                 |
| pAG304_GAL1pr-ccdB*          | Integrative      | [5]                 |
| pYES_GAL1pr-FUS-GFP          | 2μ               | [5]                 |
| pYES_CT*                     | 2μ               | [5]                 |
| p426_GAL1pr-FLAG-HTTp103-GFP | 2μ               | This study          |
| p426_GAL1pr-GFP-AB42         | 2μ               | This study          |
| p426*                        | 2μ               | ATCC® 87341™ **     |
| p425_GAL1pr-GFP-AB42         | 2μ               | This study          |
| p425*                        | 2μ               | ATCC® 87339™ **     |
| pGKS5_ADH1pr-acKRAS V12      | 2μ               | [3]                 |
| pGKS5_ADH1pr-HRAS V12        | 2μ               | [3]                 |
| pGKS5*                       | 2μ               | [3]                 |
| pJG4-5_GAL1pr-BRAF           | 2μ               | [3]                 |
| pJG4-5*                      | 2μ               | [3]                 |

\* Empty plasmids used as controls, \*\* American Type Culture Collection

## 2. Supplementary methods

### 2.1 Yeast plasmids and strains

All plasmids and strains used in this study are listed in **Table S1 and S2**. To construct p426\_GAL1pr-FLAG-HTT103Q-GFP, the sequence *GAL1pr-FLAG-HTT103-GFP* from p425GAL1-HTT103Q was amplified by PCR and cloned into the p426 vector using the In-Fusion Cloning kit (TAKARA Clontech). p426\_GAL1pr-GFP-A $\beta$ 42 was generated by inserting the sequence GFP-A $\beta$ 42, obtained by the double digestion of p416\_GPDpr-GFP-A $\beta$ 42 with *Bam*HI/*Sma*I, into the p426 vector. p425\_GAL1pr-GFP-A $\beta$ 42 was generated by subcloning the sequence GAL1pr-GFP-A $\beta$ 42 into the *Sac*I/*Hind*III restriction sites of p425 vector.

### 2.2 Yeast growth conditions

SC medium containing 1% raffinose was used for growth of PD and ALS integrative yeast models. Synthetic dropout CSM-URA medium containing 1% raffinose was used for growth of ALS episomal yeast model. Synthetic dropout CSM-LEU, CSM-LEU-URA and CSM-HIS-URA-TRP media supplemented with standard concentrations of the required amino acids and containing 1% raffinose, were used for growth of HD, AD and RAS-RAF-interaction yeast models, respectively. Growth of Crz1-activation yeast model was performed in SC medium containing 2% glucose and Crz1 activation was induced with 1.8 mM MnCl<sub>2</sub>. Cells cultures were prepared as described in **Materials and Methods**.

### 2.3 Growth assays.

Growth assays were carried out as described in **Materials and Methods** section.

### 2.4 Growth curve data analysis methods

Raw data were exported from Excel and read into R software for plots construction, calculation of growth parameters and performance of statistical analysis to compare curves (our unpublished data). Briefly, values of optical densities at 600 nm (raw OD) were read for 9 replicates, and the corresponding blank values. The procedure of Toussaint and Conconi [6] was then implemented: raw ODs were subtracted by the correspondent blank value to give the corrected OD values; whenever corrected OD values were negative (which implies that the OD was smaller or equal to the correspondent blank value), a corrected OD of 0.001 was used; corrected ODs were divided by the minimum OD and then transformed applying the natural logarithm (giving lnODs). Corrected OD values divided by the minimum OD were represented graphically. To calculate the growth parameters we used Adjustment of a model-free spline (nonparametric) and Model fitting (parametric) approaches.

### 2.5 Flow cytometry

Growth assays were carried out as described in **Materials and Methods**. To analyze cell viability with PI, cells were incubated with 20  $\mu$ g/mL of PI for 30 min at 30°C protected from light. FCM was performed in a FACS BD Calibur, equipped with a blue solid state laser (488 nm), green fluorescence channel 530/30 nm, and orange red fluorescence channel 610/20 nm.

### 2.6 Fluorescence microscopy

Fluorescence microscopy was carried out as described in **Materials and Methods**.

### 2.7 Protein extraction and immunoblotting

Protein extraction and immunoblotting were carried out as described in **Materials and Methods**, using the TCA protein extraction protocol.

### 2.8 $\beta$ -Galactosidase assays

$\beta$ -Galactosidase assays were carried out as described in **Materials and Methods**. Monitoring of Crz1 activation in solid medium was performed similarly with the exception that cells were patched onto solid glucose medium supplemented or not with  $\text{MnCl}_2$  for 90 min before the overlay procedure.

### 2.9 Statistical analysis

Statistical analyses were carried out as described in **Materials and Methods**.

## 3. Supplementary figures – Part I

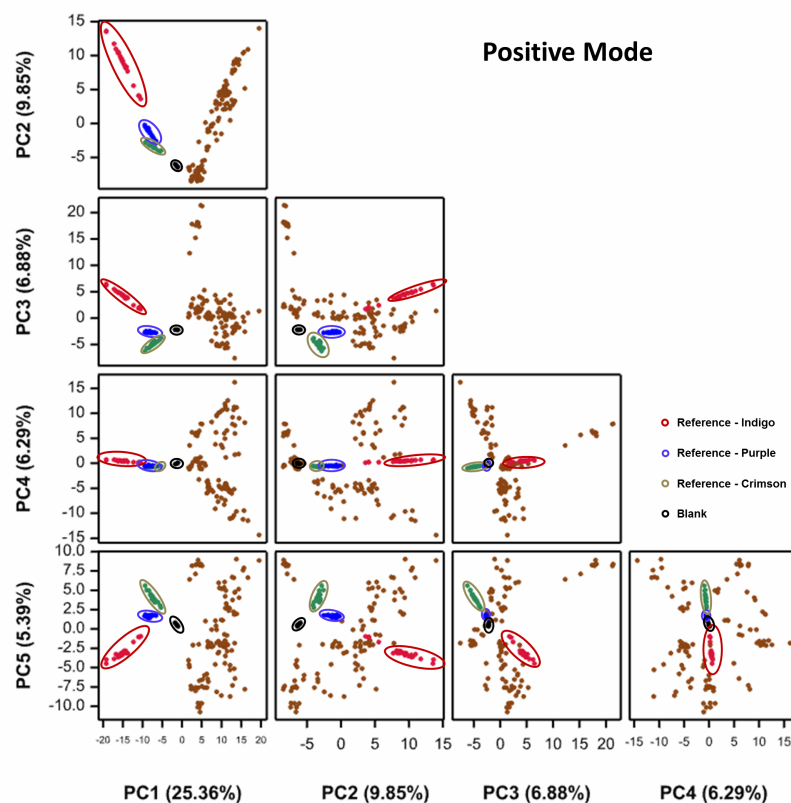

**Figure S1.** PCA of the correlation matrix of the entire positive mode dataset, including blanks, QC samples (*S. lycopersicum* Crimson, Indigo [7] and Purple [8]) and *Rubus* samples. Principal components 1, 2, 3, 4 and 5 explain 25.36, 9.85, 6.88, 6.29 and 5.39% of the variation, respectively. The PCA plots indicate a clear distinction between the samples and QCs and blanks. The QCs consist of tomato juice from tomatoes expressing different classes of (poly)phenols thereby confirming that the analytical method utilized in this study successfully distinguishes *Rubus* (green) from non-*Rubus* material and different tomato juices based on their (poly)phenolic profiles.

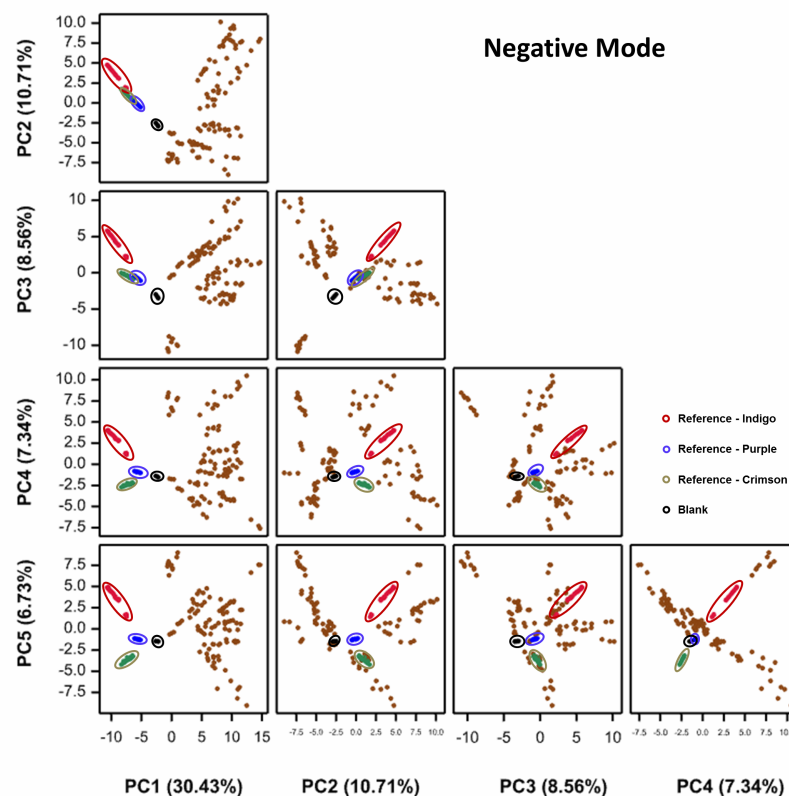

**Figure S2.** PCA analysis of entire negative mode dataset, including blanks, QC samples (*S. lycopersicum* Crimson, Indigo [7] and Purple [8]) and *Rubus* samples. Principal components 1, 2, 3, 4 and 5 explain 30.43, 10.71, 8.56, 7.34 and 6.73% of the variation, respectively. The PCA plots indicate a clear distinction between the samples and QCs and blanks. The QCs consist of tomato juice from tomatoes expressing different classes of (poly)phenols thereby confirming that the analytical method utilized in this study successfully distinguishes *Rubus* (green) from non-*Rubus* material and different tomato juices based on their (poly)phenolic profiles.



### 3. Supplementary information: SMART discovery platform

A yeast-based screening platform was used for the identification of *Rubus* bioactivities. We used various yeast models of redox-related neurodegenerative diseases (NDs) based on the expression of human genes associated with different NDs, (*SNCA* [2], *FUS/TLS* [5], *HTT<sup>pQ103</sup>* [9] or *A $\beta$ 42* [10]) fused to GFP (**Figures S3a–S6a**). Upon induction of expression of each protein with galactose, the growth of yeast cells was impaired (**Figures S3b–S6b, S3c–S6c**). Growth data was modeled using nonlinear parametric regression to estimate the growth parameters (final biomass, maximum growth rate, lag time, doubling time and area under curve – AUC), as well as the percentage of protection (with 95% confidence intervals) (**Figures S3c–S6c**). The AUC parameter was used to calculate the protection factor of *Rubus* extracts towards each disease pathological process.

Protein expression, inferred by the increase in GFP fluorescence signal (**Figures S3d–S6d**) was accompanied by an increase of propidium iodide-permeable cells in the PD model, indicating also cytotoxicity that was associated with the accumulation of protein inclusions (**Figures S3e–S6e**). We used the various yeast models for the identification of bioactive extracts/compounds that interfered with specific cellular pathologies associated with NDs.

In addition, we also included models of cancer-associated cellular pathologies in the SMART discovery platform. These consisted in the expression of mutant versions of *RAS* and *RAF* genes, encoding hyperactivated proteins of the RAS–RAF–MEK–ERK cell proliferation signaling pathway, in human cells. The yeast two-hybrid approach was previously shown to be an effective tool to address the pathological interaction between RAS and RAF, upstream of the MEK–ERK signaling pathway. In the RAS/RAF yeast model, KRAS and HRAS isoforms were fused to  $\lambda$ CI DNA binding domain and its expression controlled by the constitutive *ADH1* promoter whereas BRAF was expressed as fusion with the bacterial B42 activation domain under the control of the galactose-inducible *GAL1* promoter [3]. Protein interaction was assessed by the activation of *lacZ* and *LYS2* genes (**Figure S7a**), through the measurement of  $\beta$ -galactosidase activity (**Figures S7b,c**) and cellular growth in media devoid of lysine (**Figures S7d,e**). This simple system greatly facilitates the identification of bioactive molecules potentially inhibiting RAS/RAF pathological interactions in large collections.

As a common link between neurodegeneration and cancer, inflammation models were also included in the discovery platform. Crz1 is the yeast homologue of NFAT, a transcription factor controlling inflammatory responses in humans. Similarly to NFAT, Crz1 regulation is modulated by the calcium ( $\text{Ca}^{2+}$ )-signaling pathway, which culminates in calcineurin (CaN) activation by calmodulin, Crz1 dephosphorylation and nuclear translocation [11,12]. The yeast  $\text{Ca}^{2+}$ /CaN/Crz1 reporter strain encodes *lacZ* under the control of a promoter bearing Crz1 binding sites (Crz1-*lacZ* model) [4] (**Figure S8a**), representing an easy tool to assess Crz1 activation through the measurement of  $\beta$ -galactosidase activity [12] (**Figure S8c**). An additional strain, encoding the fusion CRZ1-GFP driven by the native *CRZ1* promoter (**Figure S8b**) allowed assessment of Crz1 nuclear accumulation in cells with disturbed  $\text{Ca}^{2+}$  cytosolic levels [4] (**Figure S8d**). Given the evolutionary conservation of NFAT and Crz1 activation mechanisms, reinforced by the conserved activity of FK506 and cyclosporin immunosuppressants in both yeast and humans [13], the yeast  $\text{Ca}^{2+}$ /CaN/Crz1 reporter assay represents an easy and reliable tool to identify small molecules with potential to attenuate NFAT-mediated inflammatory responses.

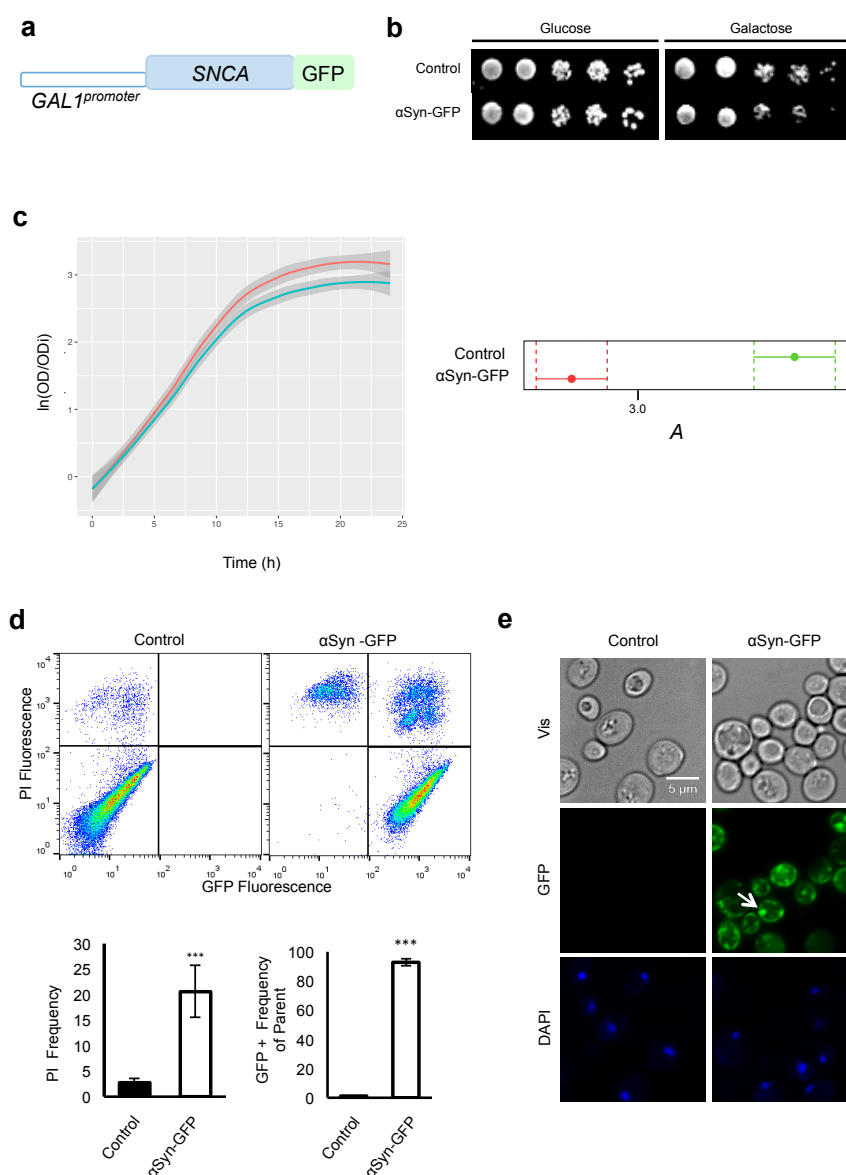

**Figure S3.** Yeast model of Parkinson's disease. **(a)** Schematics of *SNCA* construct indicating the yeast *GAL1* promoter and the chimeric fusion *SNCA*-GFP. W303-1A recombinant cells expressing two copies of *SNCA*-GFP were pre-grown in SC raffinose medium and cells containing the empty vectors were used as control. **(b)** Cell viability assessed by phenotypic growth assays on SC glucose and SC galactose media. **(c)** Growth curves of cells diluted in SC galactose medium and incubated for 24 h. Growth parameters were estimated as described in 2.4. 95% confidence intervals for the final biomass (*A*) are shown as the growth parameter most affected in this disease model (right panel). **(d)** Cell viability and  $\alpha$ Syn expression evaluated by PI vs  $\alpha$ Syn-GFP fluorescence, respectively, assessed by FCM (upper panel). The percentage of  $\alpha$ Syn-GFP-positive and PI-positive cells is shown (lower panel). **(e)** Fluorescence microscopy images of cells induced with galactose, indicating  $\alpha$ Syn intracellular inclusions. Representative images are shown and the values represent the mean  $\pm$  SEM of at least three biological replicates, \*\*\* $p < 0.001$ .

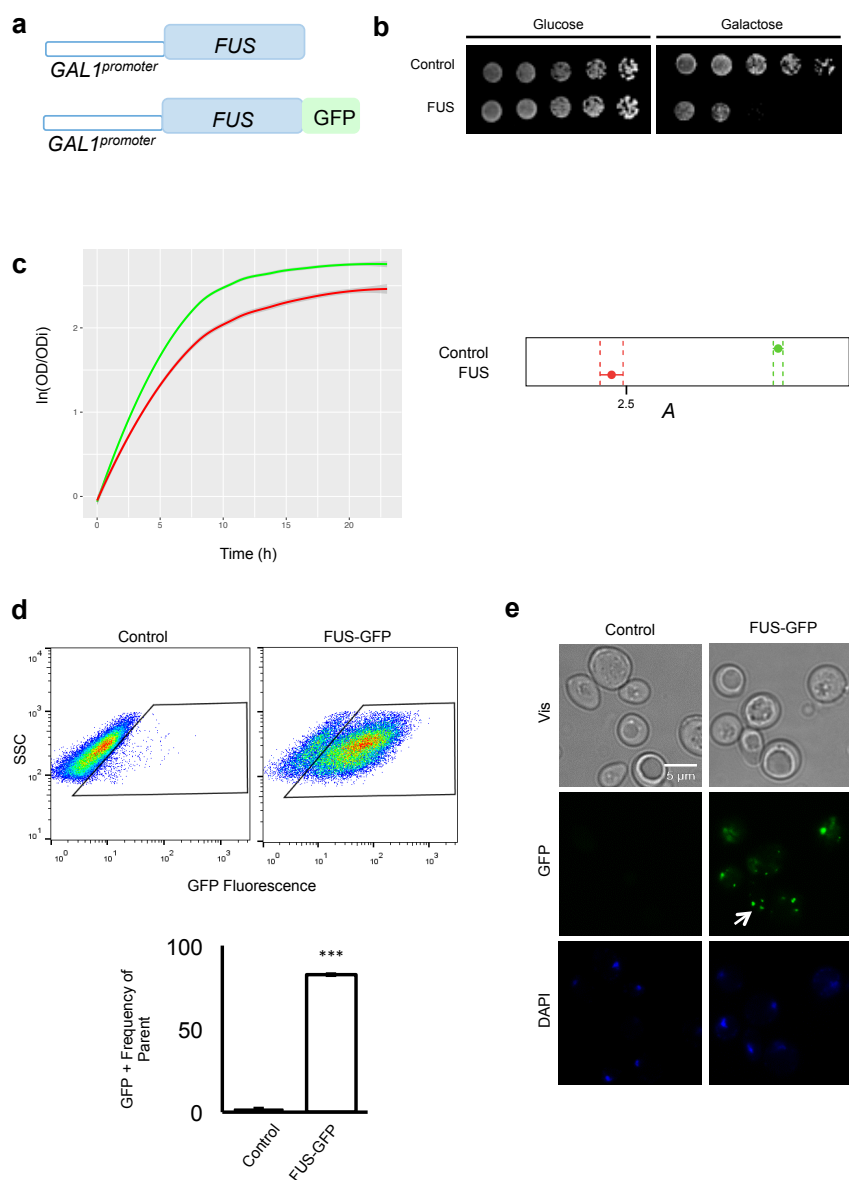

**Figure S4.** Yeast model of Amyotrophic Lateral Sclerosis. **(a)** Schematics of *FUS* constructs indicating the yeast *GAL1* promoter and the constructs, fused or not with GFP. W303-1A recombinant cells expressing *FUS* were pre-grown in SC raffinose medium and cells containing the empty vector were used as control. **(b)** Cell viability assessed by phenotypic growth assays on SC glucose and SC galactose media. Representative experiments are shown. **(c)** Growth curves of cells diluted in SC galactose medium and incubated for 24 h. Growth parameters were estimated as described in 2.4. 95% confidence intervals for the final biomass (A) are shown as the growth parameter most affected in this disease model (right panel). **(d)** *FUS* expression (SSC vs. *FUS*-GFP fluorescence) assessed by FCM (upper panel). The percentage of *FUS*-GFP-positive cells is shown (lower panel). **(e)** Fluorescence microscopy images of cells induced with galactose, indicating *FUS* intracellular inclusions. Representative images are shown and values represent the mean  $\pm$  SEM of at least three biological replicates, \*\*\*p < 0.001.

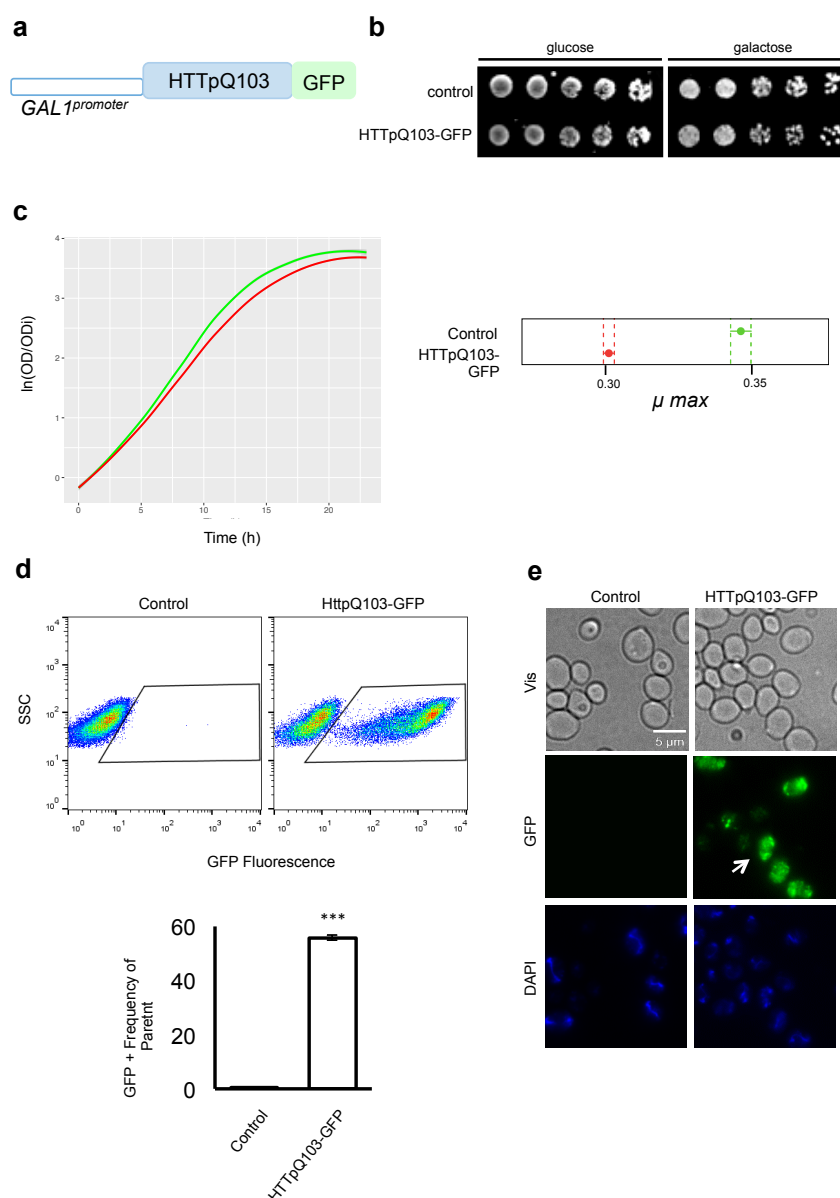

**Figure S5.** Yeast model of Huntington's disease. **(a)** Schematics of *HTTpQ103* construct indicating the yeast *GAL1* promoter and the chimeric fusion *HTTpQ103*-GFP. BY4741\_erg6 recombinant cells expressing *HTTpQ103*-GFP from a 2 $\mu$  vector were pre-grown in SD raffinose medium and cells containing the empty vector were used as control. **(b)** Cell viability assessed by phenotypic growth assays on SD glucose and SD galactose media. **(c)** Growth parameters were estimated as described in 2.4. 95% confidence intervals for the maximum growth rate ( $\mu_{\max}$ ) are shown as the growth parameter most affected in this disease model (right panel). **(d)** *HTTpQ103* expression (SSC vs *HTTpQ103*-GFP fluorescence) assessed by FCM (upper panel). The percentage of *HTTpQ103*-GFP-positive cells is shown (lower panel). **(e)** Fluorescence microscopy images of cells induced with galactose, indicating *HTTpQ103* intracellular inclusions. Representative images are shown and values represent the mean  $\pm$  SEM of at least three biological replicates, \*\*\* $p < 0.001$ .

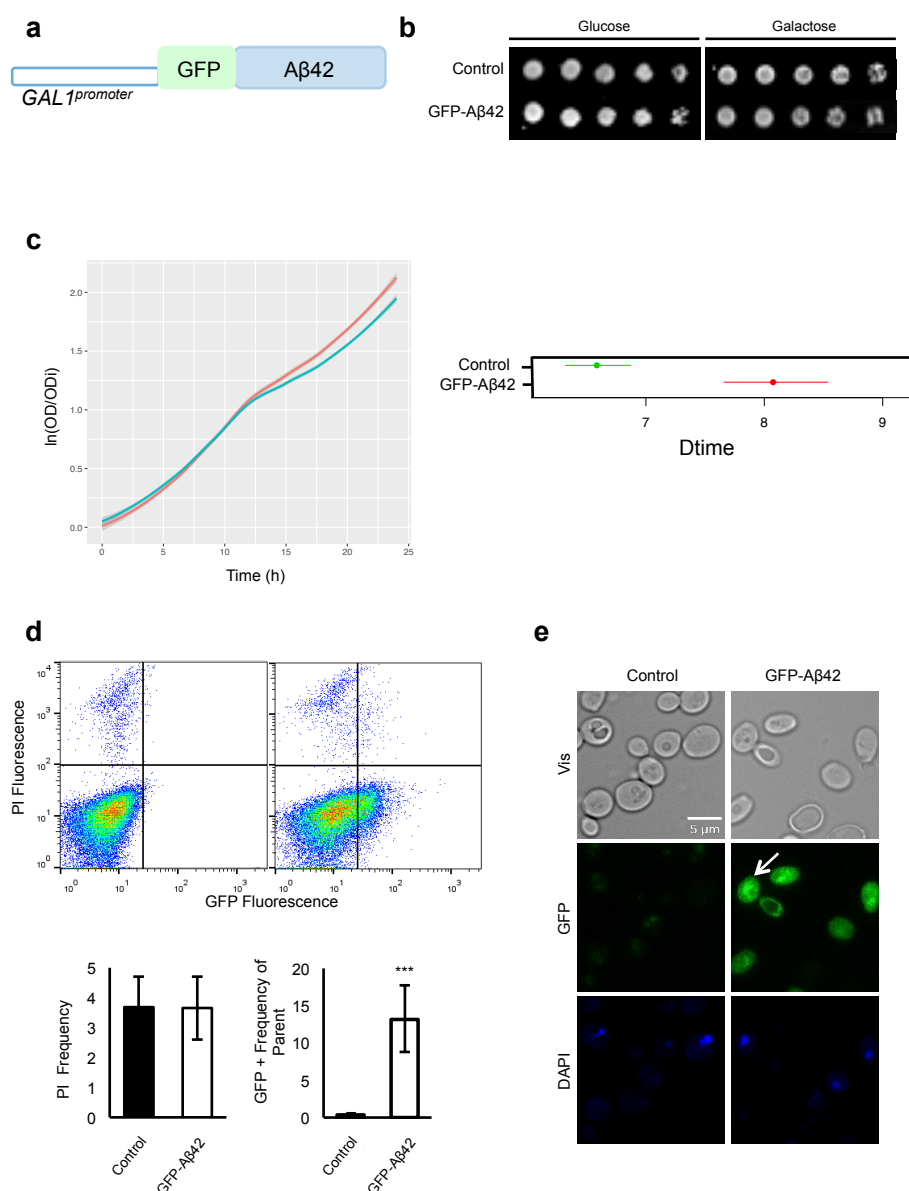

**Figure S6.** Yeast model of Alzheimer's disease. **(a)** Schematics of *Aβ42* construct indicating the yeast *GAL1* promoter and the chimeric fusion GFP-*Aβ42*. BY4741\_erg6 recombinant cells expressing GFP-*Aβ42* from 2μ vectors were pre-grown in SD raffinose medium and cells containing the empty vectors were used as control. **(b)** Cell viability assessed by phenotypic growth assays on SD glucose and SD galactose media. **(c)** Growth curves of cells diluted in SC galactose medium and incubated for 24 h. Growth parameters were estimated as described in 2.4. 95% confidence intervals for the doubling time (Dtime) as the growth parameter most affected in this disease model (right panel). **(d)** Cell viability and *Aβ42* expression evaluated by PI vs GFP-*Aβ42* fluorescence, respectively, assessed by FCM (upper panel). The percentage of GFP-*Aβ42*-positive and PI-positive cells is shown (lower panel). **(e)** Fluorescence microscopy images of cells induced with galactose, indicating *Aβ42* intracellular inclusions. Representative images are shown and values represent the mean ± SEM of at least three biological replicates, \*\*\*p < 0.001.

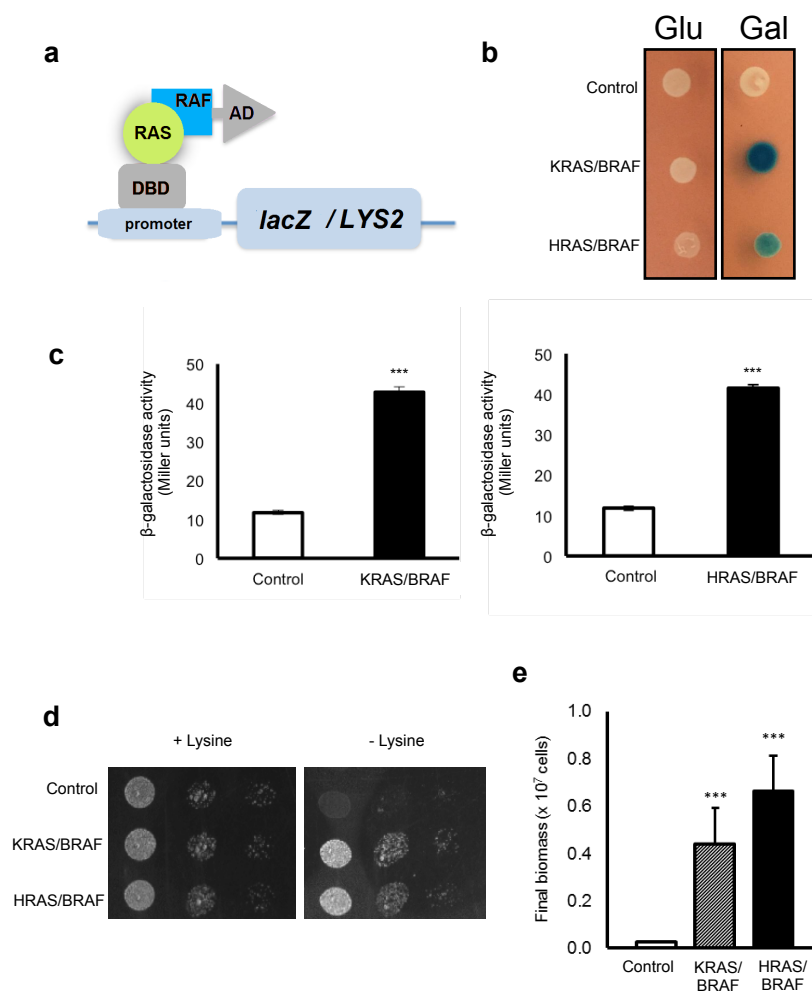

**Figure S7.** Yeast model of RAS/RAF interaction. (a) Schematics of the yeast two-hybrid system used to address RAS/RAF interaction. Constitutively activated versions of KRAS and HRAS human isoforms fused to  $\lambda$ CI DNA binding domain (DBD) were co-expressed with human BRAF fused to B42 activation domain (AD) and protein interaction was inferred through the activation of *lacZ* or *LYS2* genes. SKY197 recombinant cells expressing *ADH1pr- $\lambda$ CI-RAS* and *GAL1pr-B42-BRAF* from 2 $\mu$  vectors were pre-grown in SD raffinose medium and cells containing the empty vectors were used as control. (b) RAS/RAF interaction assessed by monitoring of  $\beta$ -galactosidase activity in SD glucose and SD galactose media using X-Gal. (c) RAS/RAF interaction assessed by monitoring of  $\beta$ -galactosidase activity in SD galactose media using ONPG. (d) RAS/RAF interaction assessed by phenotypic growth assays on SD galactose medium supplemented or not with lysine. (e) RAS/RAF interaction assessed by monitoring the final biomass of cell cultures grown in SD galactose medium without lysine. Representative images are shown and values represent the mean  $\pm$  SEM of at least three biological replicates, \*\*\* $p < 0.001$ .

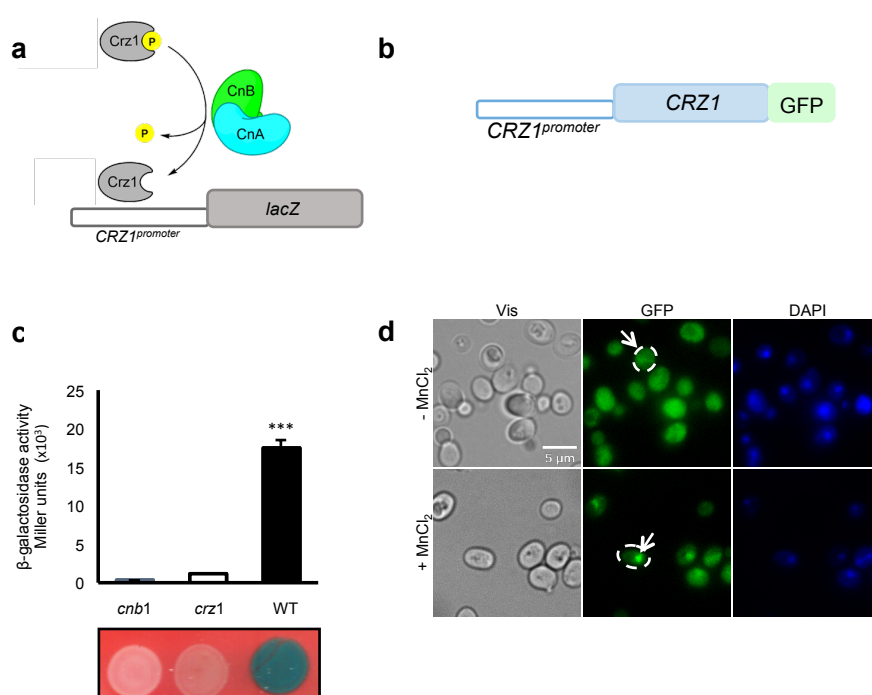

**Figure S8.** Yeast model of Crz1 activation. **(a)** Schematics of *CRZ1<sup>promoter</sup>-lacZ* reporter system. **(b)** Schematics of *CRZ1* construct indicating the *CRZ1* promoter and the chimeric fusion *CRZ1-GFP*. **(c)** YAA5, YAA7\_*cnb1*, and YAA6\_*crz1* cells encoding *CRZ1<sup>promoter</sup>-lacZ* were grown in SC glucose medium and Crz1 activation was assessed by monitoring  $\beta$ -galactosidase activity in medium supplemented with 1.8 mM MnCl<sub>2</sub>, using ONPG (upper panel). X-Gal was used to assess  $\beta$ -galactosidase activity in solid medium (lower panel). **(d)** Crz1 subcellular dynamics evaluated by fluorescence microscopy images in YAA3 Crz1-GFP-expressing cells grown in SC glucose medium supplemented or not with MnCl<sub>2</sub>. Representative images are shown and the values represent the mean  $\pm$  SEM of at least three biological replicates, \*\*\*p < 0.001.

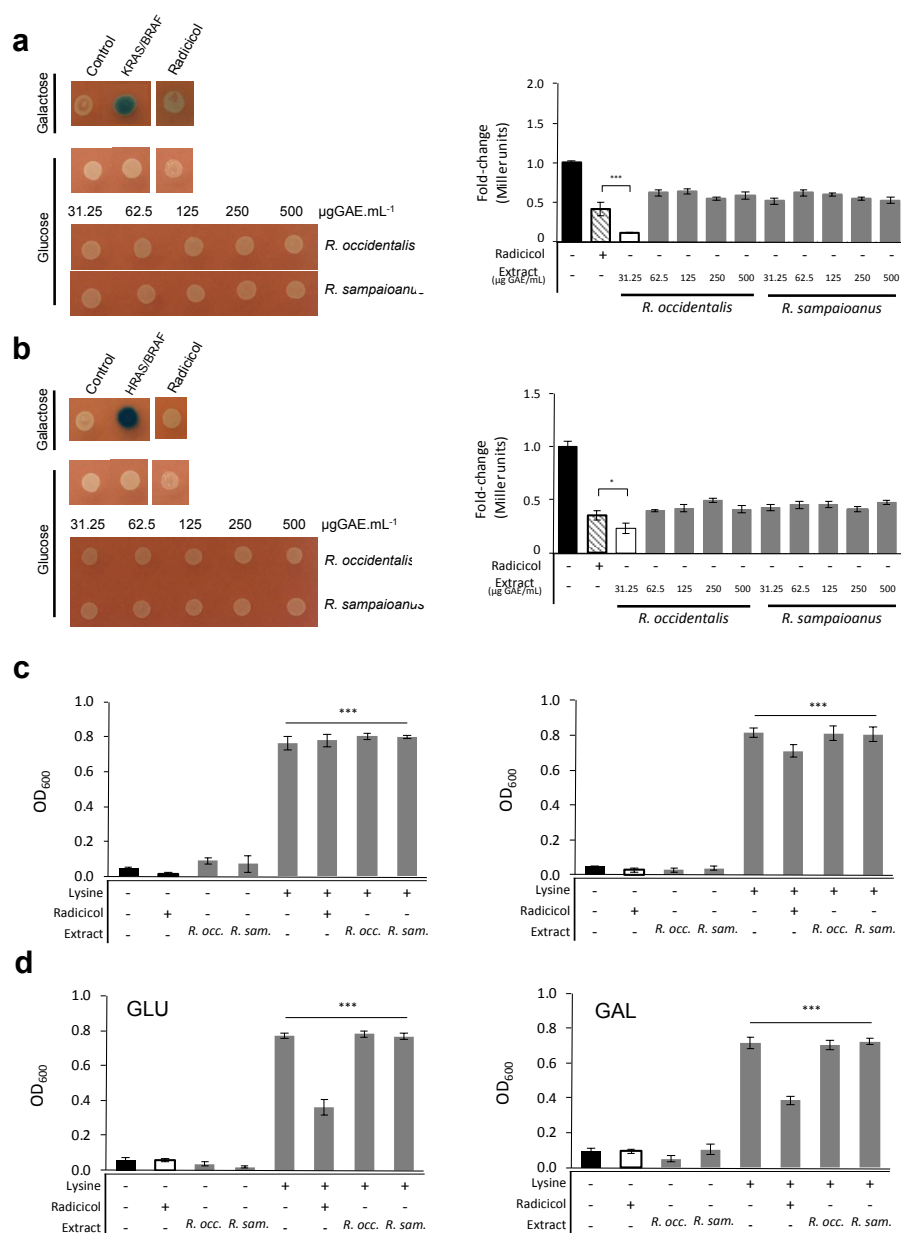

**Figure S9.** Controls assays of RAS/RAF interaction. Constitutively activated versions of KRAS and HRAS human isoforms fused to  $\lambda$ CI DNA binding domain (DBD) were co-expressed with human BRAF fused to B42 activation domain (AD) and protein interaction was inferred through the activation of *lacZ* or *LYS2* genes. Cells were grown in SD raffinose medium prior to experiments and cells containing the empty vectors were use as control. (a) KRAS/BRAF and (b) HRAS/BRAF interaction assessed by monitoring of  $\beta$ -galactosidase activity in SD glucose media using X-Gal (left panel) and ONPG (right panel). (c) KRAS/BRAF (left panel) and HRAS/BRAF (right panel) interaction assessed by monitoring the final biomass of cell cultures grown in SD glucose medium supplemented or not with lysine and 125  $\mu\text{gAE.mL}^{-1}$  of extracts (d) Assessment of the final biomass of cell cultures expressing the control plasmids grown in SD glucose (left panel) or SD galactose (right panel) medium supplemented or not with lysine and 125  $\mu\text{gAE.mL}^{-1}$  of extracts. Representative images are shown and the values represent the mean  $\pm$  SEM of at least three biological replicates, \* $p < 0.05$ , \*\*\* $p < 0.001$ . *R. occ.* – *R. occidentalis*; *R. sam.* – *R. sampaioanus*



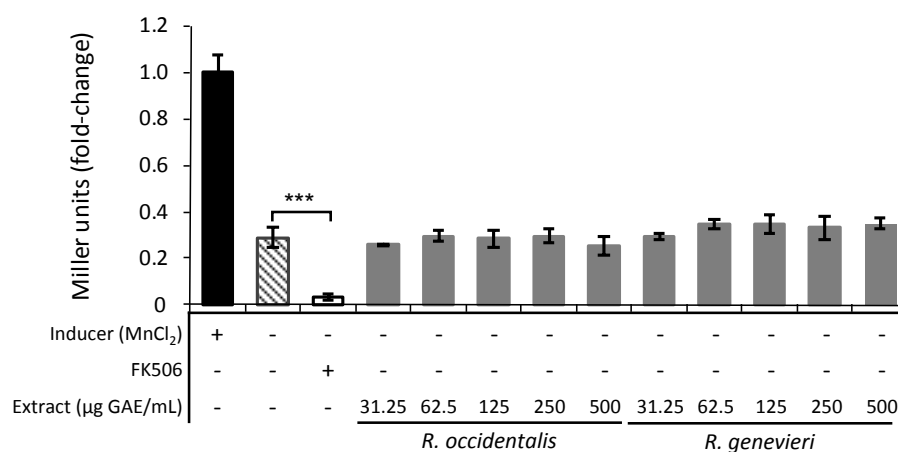

**Figure S10.** Controls assays of Crz1 activation. YAA5 cells encoding *CRZ1<sup>promoter</sup>-lacZ* were grown in SC glucose medium and Crz1 activation was assessed by monitoring  $\beta$ -galactosidase activity in medium without MnCl<sub>2</sub> using ONPG (upper panel). X-Gal was used to assess  $\beta$ -galactosidase activity in solid medium (lower panel). Representative images are shown and the values represent the mean  $\pm$  SEM of at least three biological replicates, \*\*\* $p < 0.001$ .

## 5. Supplementary figures – Part II

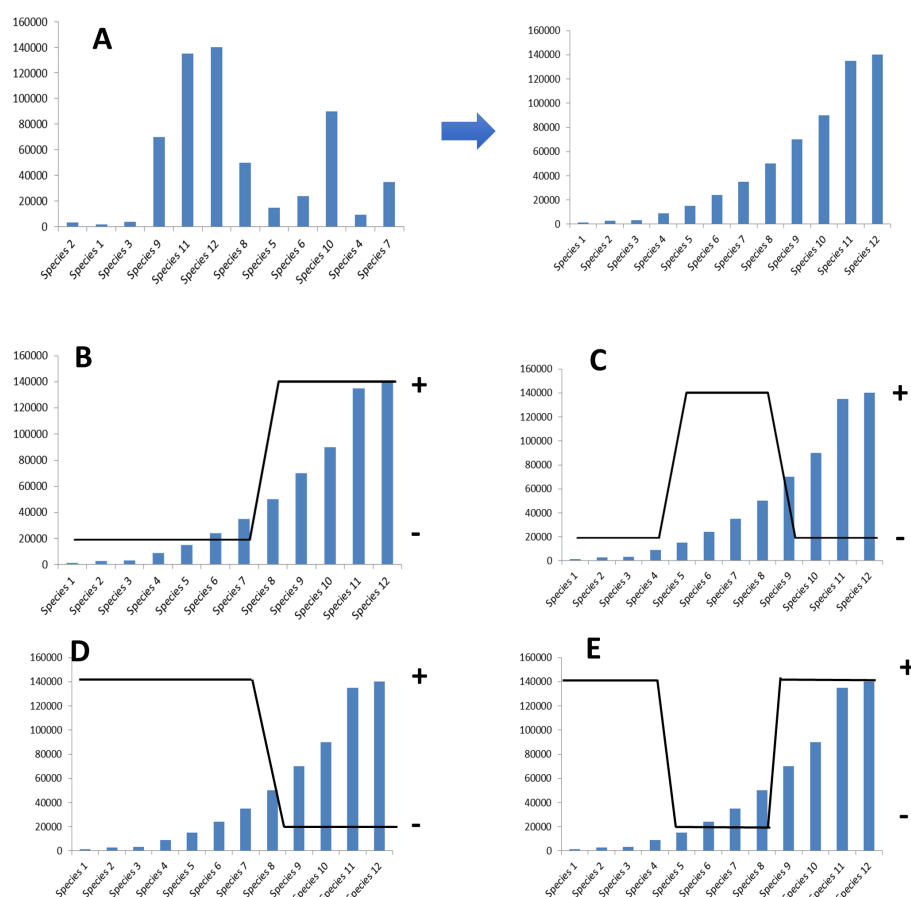

**Figure S11.** Visual representation of a Runs test. (A) Species (x-axis) are ranked according to the abundance of a molecular feature (y-axis), any significantly larger than expected number of runs for the same bioactivity level (i.e. bioactive extract or non-bioactive extract) with increasing molecular feature levels will result in a significant result. (B), (C), (D) and (E) Overlay of bioactivity results (+ - Bioactive extract; - - non-bioactive extract) with molecular feature levels. Note that species extracts are ranked according to molecular feature abundance. (B) – Trend expected for bioactive feature in which the activity is not hampered by increasing concentrations of feature. (C) – Trend expected for a bioactive feature in which high levels of compound could have cytotoxic effects in the disease model. (D) - Trend expected for a molecular feature that hampers bioactivity at high levels. (E) – Bioactivity observed in the higher and lower ranges of concentrations, but not at intermediate levels. This can be a special case of pattern B, in which different features may exert bioactive properties, thus when the feature is present in low amounts, the protective effect could be conferred by another compound.

## 6. References

1. Sumner, L.W.; Amberg, A.; Barrett, D.; Beale, M.H.; Beger, R.; Daykin, C.A.; Fan, T.W.; Fiehn, O.; Goodacre, R.; Griffin, J.L., et al. Proposed minimum reporting standards for chemical analysis Chemical Analysis Working Group (CAWG) Metabolomics Standards Initiative (MSI). *Metabolomics* **2007**, *3*, 211–221, doi:10.1007/s11306-007-0082-2.
2. Outeiro, T.F.; Lindquist, S. Yeast cells provide insight into alpha-synuclein biology and pathobiology. *Science* **2003**, *302*, 1772–1775, doi:10.1126/science.1090439.
3. Khazak, V.; Kato-Stankiewicz, J.; Tamanoi, F.; Golemis, E.A. Yeast screens for inhibitors of Ras-Raf interaction and characterization of MCP inhibitors of Ras-Raf interaction. *Methods Enzymol* **2006**, *407*, 612–629, doi:10.1016/S0076-6879(05)07048-5.
4. Araki, Y.; Wu, H.; Kitagaki, H.; Akao, T.; Takagi, H.; Shimoi, H. Ethanol stress stimulates the Ca<sup>2+</sup>-mediated calcineurin/Crz1 pathway in *Saccharomyces cerevisiae*. *J Biosci Bioeng* **2009**, *107*, 1–6, doi:10.1016/j.jbiosc.2008.09.005.
5. Ju, S.; Tardiff, D.F.; Han, H.; Divya, K.; Zhong, Q.; Maquat, L.E.; Bosco, D.A.; Hayward, L.J.; Brown, R.H., Jr.; Lindquist, S., et al. A yeast model of FUS/TLS-dependent cytotoxicity. *PLoS Biol* **2011**, *9*, e1001052, doi:10.1371/journal.pbio.1001052.
6. Toussaint, M.; Conconi, A. High-throughput and sensitive assay to measure yeast cell growth: a bench protocol for testing genotoxic agents. *Nat Protoc* **2006**, *1*, 1922–1928, doi:10.1038/nprot.2006.304.
7. Zhang, Y.; Butelli, E.; Alseekh, S.; Tohge, T.; Rallapalli, G.; Luo, J.; Kwar, P.G.; Hill, L.; Santino, A.; Fernie, A.R., et al. Multi-level engineering facilitates the production of phenylpropanoid compounds in tomato. *Nat Commun* **2015**, *6*, 8635, doi:10.1038/ncomms9635.
8. Butelli, E.; Titta, L.; Giorgio, M.; Mock, H.P.; Matros, A.; Peterek, S.; Schijlen, E.G.; Hall, R.D.; Bovy, A.G.; Luo, J., et al. Enrichment of tomato fruit with health-promoting anthocyanins by expression of select transcription factors. *Nat Biotechnol* **2008**, *26*, 1301–1308, doi:10.1038/nbt.1506.
9. Willingham, S.; Outeiro, T.F.; DeVit, M.J.; Lindquist, S.L.; Muchowski, P.J. Yeast genes that enhance the toxicity of a mutant huntingtin fragment or alpha-synuclein. *Science* **2003**, *302*, 1769–1772, doi:10.1126/science.1090389.
10. Bharadwaj, P.; Martins, R.; Macreadie, I. Yeast as a model for studying Alzheimer's disease. *FEMS Yeast Res* **2010**, *10*, 961–969, doi:10.1111/j.1567-1364.2010.00658.x.
11. Stathopoulos, A.M.; Cyert, M.S. Calcineurin acts through the CRZ1/TCN1-encoded transcription factor to regulate gene expression in yeast. *Genes Dev* **1997**, *11*, 3432–3444.
12. Garcia, G.; Santos, C.N.; Menezes, R. High-Throughput Yeast-Based Reporter Assay to Identify Compounds with Anti-inflammatory Potential. *Methods Mol Biol* **2016**, *1449*, 441–452, doi:10.1007/978-1-4939-3756-1\_29.
13. Matheos, D.P.; Kingsbury, T.J.; Ahsan, U.S.; Cunningham, K.W. Tcn1p/Crz1p, a calcineurin-dependent transcription factor that differentially regulates gene expression in *Saccharomyces cerevisiae*. *Genes Dev* **1997**, *11*, 3445–3458.
